# Supplementary material
Source: publisher figshare collection journal article supplement (https://tandf.figshare.com/ndownloader/files/17430458)
Supplement: Supplementary file 1 [file 17430458]

# Supplementary information

Effects of single- and hybrid-frequency extremely low-frequency electromagnetic field stimulations on long-term potentiation in the hippocampal Schaffer collateral pathway

Yu Zheng 1*, Xiao-xu Ma1, Lei Dong2, Yang Gao3, and Lei Tian1

1 School of Electronics and Information Engineering, Tianjin polytechnic university, Tianjin 300387, China;

2 State Key Laboratory of Precision Measurement Technology and Instruments, Tianjin University, Tianjin 300072, China.

3The School of Information Technology and Electrical Engineering, The University of Queensland, Queensland 4072, Australia

* Corresponding author. Address: School of Electronics and Information Engineering, No.399, Binshuixi Road, Xiqing District, Tianjin polytechnic university, Tianjin China 300387

E-mail: [zhengyu@tjpu.edu.cn](mailto:zhengyu@tjpu.edu.cn)

In this paper, we used ELF-EMF magnetic stimulation drive to generate magnetic stimulation at eight different frequencies with an intensity of 1 mT. The magnetic induction intensity of brain slices was simulated by COMSOL Multiphysics 4.4 software(COMSOL Inc, Sweden) for each frequency of magnetic stimulation, and then tested by using milf-tesla device(HT108, Htmagnet, China).

Taking the 50 Hz magnetic stimulation result simulated by COMSOL software as an example, **FigS1.A** shows the simulation results of the strength of the coil and the perfusion chamber, while **FigS1.B** directly extracts the simulation results of the brain slice. The simulation results show that the magnetic induction intensity on the brain slice is uniform and 1 mT.


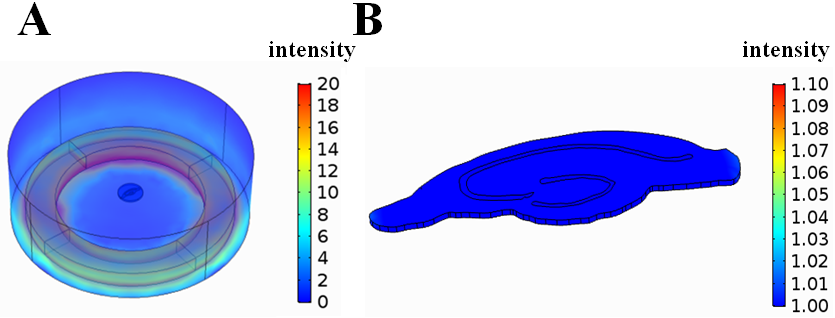


**Figure S1** Simulation results of intensity distribution. (A) The magnetic induction intensity distribution around the perfusion chamber and coil. (B) The magnetic induction intensity distribution on the brain slice.
